# Supplementary material
Source: PubMed Central journal article supplement (PMC9794383)
Supplement: NIHMS1835684-supplement-1.pdf [file NIHMS1835684-supplement-1.pdf]

## **Supplementary Material, Appendix 1. Sample size justification.**

### *Sample size justification*

Since cCLS is an aggregate score derived from the subjective algorithmic assessment of up to six MR imaging features (22), we inferred that a minimum of 10 ccRCC and 10 non-ccRCC SRMs were required per feature to minimize the risk of overfitting cCLS accuracy. This required 60 ccRCC SRMs and 60 non-ccRCC SRMs. Using the lower prevalence of non-ccRCC in SRMs (i.e. 35.6%)(4), we divided the number of non-ccRCC SRMs required to fit the cCLS algorithm (i.e. 60) by the prevalence of non-ccRCC SRMs, which yielded the number of consecutive SRMs required to obtain 60 non-ccRCC SRMs. Therefore, 169 consecutive cT1a renal masses were needed to obtain 60 non-ccRCC tumors ( $60/0.365$ ), which would include an estimated 109 ccRCC SRMs. Our sample of 250 SRMs (50 SRMs per institution) therefore had a higher number of masses than the minimum number required. Moreover, relatively wide 95% CIs for cCLS3 SRMs have been previously reported (i.e., 2%,23% (24) and 9%,30% (23)). We estimated a sample of 250 masses (50 SRMs per site) to most efficiently reduce the 95% CI for cCLS3 to 12%, 24%.

## **Supplementary Material, Appendix 2. Histological Diagnosis.**

All renal masses in the study had a histopathological diagnosis established by either nephrectomy (71% [177/250]) or image-guided percutaneous 18-gauge or larger core needle biopsy (29% [73/250]). All specimens were processed and diagnoses rendered by urological pathologists using standards specified by the available version of the World Health Organization (WHO) classification of renal tumors at the time of processing (44). Histological diagnosis was further grouped into malignant and benign neoplasms (Supplemental Table 1) (42).

**Supplementary Table 1. Dichotomization of histology results in malignant and benign categories.**

| <b>Malignant</b>                                        | <b>Benign</b>                   |
|---------------------------------------------------------|---------------------------------|
| Clear cell RCC                                          | Oncocytoma                      |
| Papillary RCC                                           | Fat-poor AML                    |
| Chromophobe RCC                                         | Oncocytic neoplasm <sup>1</sup> |
| RCC unclassified                                        |                                 |
| Clear cell-papillary tumors                             |                                 |
| Metastasis                                              |                                 |
| Mucinous tubular and spindle cell tumors                |                                 |
| Low grade epithelial neoplasm                           |                                 |
| Multilocular cystic neoplasm of low malignant potential |                                 |
| Lymphoma                                                |                                 |
| Epithelioid AML                                         |                                 |
| Sclerosing PEComa (low grade epithelioid neoplasm)      |                                 |

1-Oncocytic neoplasms are considered a benign/indolent diagnosis (23)

**Supplementary Table 2a. Multiparametric MRI techniques used for renal masses at institution 1, including imaging at 1.5 and 3 Tesla<sup>a</sup>.**

| Pulse Sequence                      | Dual-echo T1W GRE |                                       |               | T2W TSE/FSE                          | Volume Interpolated T1W 3D GRE <sup>b</sup> |           | Diffusion-weighted imaging <sup>c</sup> |
|-------------------------------------|-------------------|---------------------------------------|---------------|--------------------------------------|---------------------------------------------|-----------|-----------------------------------------|
|                                     | 2D GRE            | 3D GRE                                |               | Single-shot TSE/FSE                  | 3T                                          | 1.5T      | Single-shot echo-planar imaging         |
|                                     |                   | 3T                                    | 1.5T          |                                      |                                             |           |                                         |
| Physiology                          | Breath Hold       | Breath Hold                           | Breath hold   | Respiratory Triggered<br>Breath hold | Breath Hold                                 |           | Breath Hold                             |
| Duration                            | 21 sec.           | 16 sec.                               | 20 sec.       | 3-4 min.<br>22 sec.                  | 20 sec.                                     |           | 21 sec                                  |
| Fat Suppression                     | N/A               | N/A                                   | N/A           | N/A                                  | Chemical or Spectral Inversion Recovery     |           | Spectral Inversion Recovery             |
| TE (IP/OP) <sup>c</sup> ; TR (msec) | (4.6/2.3);160-180 | (2.5/1.3);5.5<br>and<br>(2.2/1.1);4.0 | (4.6/2.3);7.6 | 83-88;1030                           | 1.7-2.5; 4.0-4.5                            | 1.4;4.3   | 60.8-74;2075-4600                       |
| Flip angle (degrees)                | 70                | 10-12                                 | 10            | 180                                  | 10-12                                       | 10-12     | 90                                      |
| Bandwidth (Hz)                      | 260               | 700                                   | 313           | 450                                  | 325-460                                     | 488       | 250-1446                                |
| Number of excitations               | 1                 | 0.7-1                                 | 1             | Half-Fourier                         | 1                                           | 1         | 2                                       |
| Acceleration factor                 | 2                 | 2                                     | 1             | 1<br>2                               | 2                                           | 2         | 2                                       |
| Matrix Size                         | 256/320 x 134/152 | 294 x 224                             | 192 x 320     | 170 x 256                            | 256 x 320                                   | 132 x 320 | 130-38;96-75                            |
| Field of view (cm)                  | 25 x 35           | 25 x 35                               | 25 x 35       | 25 x 35                              | 25 x 35                                     | 25 x 35   | 40-380;28-75                            |
| Section thickness (mm)              | 5-6               | 3-4                                   | 3-5           | 5                                    | 2.5-4                                       | 2.5-4     | 6                                       |

- a- Imaging performed on clinical 1.5 Tesla (Symphony or Aera, Siemens Healthcare) or 3 Tesla (TRIO, Siemens Healthcare; Discovery 750 W, General Electric Healthcare) systems.
- b- VIBE (Siemens Healthcare), LAVA (General Electric Healthcare).
- c- Diffusion-weighted imaging was performed with two b values (0 and 600 mm<sup>2</sup>/sec) automatically derived from the ADC map.
- d- IP=in-phase, OP=opposed phase.

**Supplementary Table 2b. Multiparametric MRI techniques used for renal masses at institution 2, including imaging at 1.5 and 3 Tesla<sup>a</sup>.**

a- Imaging performed on clinical 1.5 Tesla (Ingenia, Philips Medical Systems or Espree, Siemens Healthcare)

| Pulse Sequence                      | Dual-echo T1W GRE |                          |                          | T2W                   |             | Volume Interpolated T1W |                   |                   | Diffusion-weighted imaging                   |                |
|-------------------------------------|-------------------|--------------------------|--------------------------|-----------------------|-------------|-------------------------|-------------------|-------------------|----------------------------------------------|----------------|
|                                     | 2D GRE            | 3D GRE                   |                          | Single-shot TSE/FSE   |             | 3T                      | 1.5T <sup>b</sup> | 1.5T <sup>c</sup> | Single-shot echo-planar imaging <sup>d</sup> |                |
| Physiology                          | Breath hold       | Breath hold <sup>b</sup> | Breath hold <sup>c</sup> | Respiratory triggered | Breath hold | Breath hold             |                   |                   | Respiratory triggered                        | Free breathing |
| Duration                            | 62 sec.           | 15 sec.                  | 20 sec.                  | 1.42 min.             | 22 sec.     | 15 sec.                 | 17 sec.           | 23 sec.           | 1.51 min.                                    | 3 min. 44 sec. |
| Fat Suppression                     | N/A               | mDixon                   | N/A                      | N/A                   | N/A         | N/A                     |                   | Q fat sat         | Spectral Inversion Recovery                  | SPAIR          |
| TE (IP/OP) <sup>e</sup> ; TR (msec) | (2.38/4.87); 122  | (1.35/2.5);3.8           | (1.8/4.0);5.8            | 20;900                | 120;800     | (1.32/2.3);3.7          | 1.8;4.0           | 239;5.07          | 62;3400                                      | 84;5700        |
| Flip angle (degrees)                | 70                | 10                       | 15                       | 90                    | 150         | 10                      | 15                | 10                | 90                                           | N/A            |
| Bandwidth (Hz)                      | 410               | 1214                     | 585                      | 569                   | 488         | 1337                    | 615               | 390               | 2200                                         | 1302           |
| Number of excitations               | 1                 | 1                        | 1                        | 1                     | 1           | 1                       | 1                 | 1                 | 2                                            | 4              |
| Acceleration factor                 | N/A               | 4.5                      | 4 (C-sense)              | 2                     | 197         | 6                       | 4.5 (C-sense)     | 2 GRAPPA          | 2                                            | 2 GRAPPA       |
| Matrix Size                         | 168 x 256         | 264 x 264                | 240 x 223                | 244 x 213             | 197 x 256   | 228 x 200               | 188 x 189         | 160 x 320         | 112 x 170                                    | 140 x 192      |
| Field of view (cm)                  | 360               | 340 x 340                | 340                      | 340                   | 360         | 320 x 280               | 340               | 360               | 340                                          | 360            |
| Section thickness (mm)              | 4 x 1             | 5/2.5                    | 5                        | 5                     | 6 x 1.2     | 2.8/1.4                 | 4                 | 3.0               | 7                                            | 6 x 1.2        |

or 3 Tesla (Ingenia, Philips Medical Systems) systems.

b- Imaging parameters for 1.5 Tesla (Ingenia, Philips Medical Systems).

c- Imaging parameters for 1.5 Tesla (Espree, Siemens Healthcare) system.

d- Diffusion-weighted imaging was performed with two b values (20 and 750 mm<sup>2</sup>/sec) with the ADC map automatically derived (for Philips Medical Systems) or three b values (50, 400, and 800 mm<sup>2</sup>/sec) with the ADC map automatically derived (for Siemens Healthcare).

f- IP=in-phase, OP=opposed phase

**Supplementary Table 2c. Multiparametric MRI techniques used for renal masses at institution 3, including imaging at 1.5 and 3 Tesla<sup>a</sup>.**

| Pulse Sequence                                     | Dual-echo T1W GRE   |               |                    | T2W TSE/FSE            |                     | Volume Interpolated T1W 3D GRE <sup>b</sup> |         | Diffusion-weighted imaging <sup>c</sup> |         |
|----------------------------------------------------|---------------------|---------------|--------------------|------------------------|---------------------|---------------------------------------------|---------|-----------------------------------------|---------|
|                                                    | 2D GRE              | 3D GRE        |                    | Single-shot TSE/FSE    |                     | 3T                                          | 1.5T    | Single-shot echo-planar imaging         |         |
|                                                    |                     | 3T            | 1.5T               | 3T                     | 1.5T                |                                             |         | 3T                                      | 1.5T    |
| <b>Physiology</b>                                  | Breath Hold         | Breath Hold   | Breath hold        | Breath hold            |                     | Breath Hold                                 |         | Free breathing                          |         |
| <b>Duration</b>                                    | 15-22 sec           | 15-22 sec     | 15-22 sec          | 45-70 sec<br>45-70 sec |                     | 15-22 sec                                   |         | 15-22 sec                               |         |
| <b>Fat Suppression</b>                             | N/A                 | N/A           | N/A                | N/A                    |                     | SPAIR                                       |         | SPAIR                                   |         |
| <b>TE (IP/OP)<sup>d</sup>;</b><br><b>TR (msec)</b> | (2.5/3.7);206       | (2.5/1.2);3.9 | (4.8/2.4); 190     | 182;1200<br>97;4680    | 179;1200<br>87;4500 | 1.3;3.2                                     | 1.2;3.1 | 56;7500                                 | 57;8500 |
| <b>Flip angle (degrees)</b>                        | 65                  | 9             | 70                 | 159<br>67              | 160<br>81           | 9                                           | 9       | 90                                      | 90      |
| <b>Bandwidth (Hz)</b>                              | 930/1502<br>(IP/OP) | 1085          | 445/490<br>(IP/OP) | 505<br>650             | 505<br>650          | 505                                         | 505     | 2790                                    | 2440    |
| <b>Number of excitations</b>                       | 1                   | 1 Ask         | 1                  | 1                      | 1                   | 1                                           | 1       | 3                                       | 3       |
| <b>Acceleration</b>                                | 1-3                 | 1-2           | 1-3                | 2-3                    | 2-3                 | 1-3                                         | 1-3     | 2                                       | 2       |

| factor                 |           |           |           |                        |                        |           |           |           |           |
|------------------------|-----------|-----------|-----------|------------------------|------------------------|-----------|-----------|-----------|-----------|
| Matrix Size            | 256 x 134 | 280 x 187 | 320 x 174 | 320 x 189<br>256 x 256 | 320 x 189<br>256 x 256 | 320 x 224 | 320 x 176 | 128 x 104 | 128 x 104 |
| Field of view (cm)     | 36 x 27   | 46 x 37   | 36 x 33   | 46 x 39<br>38 x 38     | 36 x 30<br>38 x 38     | 36 x 36   | 36 x 33   | 50 x 41   | 38 x 31   |
| Section thickness (mm) | 5         | 4         | 4         | 5<br>5                 | 4<br>5                 | 3         | 3         | 5         | 5         |

- a- Imaging performed on clinical 1.5 Tesla (Aera, Siemens Healthcare; AvantoFit, Siemens Healthcare) or 3 Tesla (Skyra, Siemens Healthcare; TrioTim, Siemens Healthcare) systems.
- b- VIBE (Siemens Healthcare), LAVA (General Electric Healthcare).
- c- Diffusion-weighted imaging was performed with b values of 50, 500 and 1000 sec/mm<sup>2</sup> for Siemens 3T Skyra and b values of 50 and 800 sec/mm<sup>2</sup> for Siemens 1.5 T Aera, with the ADC map automatically derived.
- d- IP=in-phase, OP=opposed phase.

**Supplementary Table 2d. Multiparametric MRI techniques used for renal masses at institution**

**4, including imaging at 1.5 and 3 Tesla<sup>a</sup>.**

| Pulse Sequence            | Dual-echo T1W GRE |                  | T2W TSE/FSE                          |             | Volume Interpolated T1W 3D GRE <sup>b</sup> |              | Diffusion-weighted imaging <sup>c</sup> |             |
|---------------------------|-------------------|------------------|--------------------------------------|-------------|---------------------------------------------|--------------|-----------------------------------------|-------------|
|                           | 2D GRE            |                  | Single-shot TSE/FSE                  |             |                                             |              | Single-shot echo-planar imaging         |             |
|                           | 3T                | 1.5T             | 3T                                   | 1.5T        | 3T                                          | 1.5T         | 3T                                      | 1.5T        |
| Physiology                | Breath Hold       |                  | Breath hold or Respiratory Triggered |             | Breath Hold                                 |              | Free breathing or Respiratory Triggered |             |
| Duration                  | 32-80 sec         |                  | 44-235 sec                           |             | 18-24 sec                                   |              | 171-304 sec                             |             |
| Fat Suppression           | N/A               |                  | N/A                                  |             | SPAIR/SPIR                                  |              | SPAIR/SPIR                              |             |
| TE (IP/OP) <sup>d</sup> ; | (2.3-2.5/1.2-     | (4.6-            | 70-78;2000-                          | 71-80;2355- | 1.3;3                                       | 1.8-2.4;3.9- | 44-69;1705-                             | 58-64;1747- |
| TR (msec)                 | 1.3);170-201      | 4.9/2.3);150-172 | 2725                                 | 3000        |                                             | 4.7          | 7500                                    | 8000        |



|                               |                      |                       |                      |                      |                      |                      |                      |                       |
|-------------------------------|----------------------|-----------------------|----------------------|----------------------|----------------------|----------------------|----------------------|-----------------------|
| <b>Flip angle (degrees)</b>   | 55-70                | 70-75                 | 90-116               | 90-140               | 9-10                 | 9                    | 90                   | 90                    |
| <b>Bandwidth (Hz)</b>         | 1090-2828            | 450-541               | 977-1261             | 403-781              | 450-719              | 350-434              | 2488                 | 2332                  |
| <b>Number of excitations</b>  | 1                    |                       | 1                    | 1                    | 1                    | 1                    | 3-7                  | 3-4                   |
| <b>Acceleration factor</b>    | 1.6-2                | 1.8-2                 | 2-3                  | 2-3                  | 1.2-4                | 3-4                  | 2-3                  | 2                     |
| <b>Matrix Size</b>            | 180-256 x<br>153-208 | 220-320 x 182-<br>185 | 256-268 x<br>256-268 | 256-276 x<br>256-276 | 212-320 x<br>189-195 | 212-320 x<br>192-218 | 132-134 x<br>108-115 | 124-134 x 108-<br>128 |
| <b>Field of view (cm)</b>     | 30-32x34-38          |                       | 30-38x35-38          |                      | 30-38x38-42          |                      | 30-37x37-40          |                       |
| <b>Section thickness (mm)</b> | 5-6                  |                       | 6                    | 6                    | 3.3                  | 4                    | 5-6                  | 6                     |

- a- Imaging performed on clinical 1.5 Tesla (Ingenia, Philips Healthcare) or 3 Tesla (Skyra, Siemens Healthcare; or Achieva, Philips Healthcare) systems.
- b- VIBE (Siemens Healthcare) and THRIVE (Philips Healthcare).
- c- Diffusion-weighted imaging was performed with two b values (0 - 800 mm<sup>2</sup>/sec) automatically derived from the ADC map.
- d- IP=in-phase, OP=opposed phase.

**Supplementary Table 2e. Multiparametric MRI techniques used for renal masses at institution 5, including imaging at 1.5 and 3 Tesla<sup>a</sup>.**

|                       |                          |                    |                                                   |                           |
|-----------------------|--------------------------|--------------------|---------------------------------------------------|---------------------------|
| <b>Pulse Sequence</b> | <b>Dual-echo T1W GRE</b> | <b>T2W TSE/FSE</b> | <b>Volume Interpolated T1W 3D GRE<sup>b</sup></b> | <b>Diffusion-weighted</b> |
|-----------------------|--------------------------|--------------------|---------------------------------------------------|---------------------------|

|                                          |                     |                   | Single-shot TSE/FSE                  |                                         |               | imaging <sup>c</sup>                  |
|------------------------------------------|---------------------|-------------------|--------------------------------------|-----------------------------------------|---------------|---------------------------------------|
|                                          | 3T                  | 1.5T              |                                      | 3T                                      | 1.5T          | Single-shot echo-planar imaging       |
| <b>Physiology</b>                        | Breath Hold         | Breath hold       | Respiratory Triggered<br>Breath hold | Breath Hold                             |               | Breath Hold                           |
| <b>Duration</b>                          | 18-20 sec.          | 11-22 sec.        | 2-3 min.<br>22-30 sec.               | 16-22 sec.                              |               | 16-24 sec                             |
| <b>Fat Suppression</b>                   | N/A                 | N/A               | N/A                                  | Chemical or Spectral Inversion Recovery |               | Spectral Adiabatic Inversion Recovery |
| <b>TE (IP/OP)<sup>c</sup>; TR (msec)</b> | (2.46/1.23);110-144 | (4.4/2.2);120-190 | 92; 900-1010                         | 1.45; 3.12                              | 1.7; 3.51     | 59-97;3000-7300                       |
| <b>Flip angle (degrees)</b>              | 52-70               | 70                | 160 (1.5T)<br>90-110 (3T)            | 10-12                                   | 10-12         | 90                                    |
| <b>Bandwidth (Hz)</b>                    | 600-1085            | 500               | 679-780                              | 750                                     | 500           | 2035 - 2085                           |
| <b>Number of excitations</b>             | 1                   | 1                 | Half-Fourier                         | 1                                       | 1             | 2-4                                   |
| <b>Acceleration factor</b>               | 2                   | 2                 | 1<br>2                               | 2                                       | 2             | 2                                     |
| <b>Matrix Size</b>                       | 224-294 x 220-272   | 192 x 256         | 256-320 x 203-320                    | 256 x 166                               | 256 x 166-187 | 160-192 x 96-186                      |
| <b>Field of view (cm)</b>                | 25-37 x 35-39       | 30-35 x30- 35     | 27-37 x 30-37                        | 35 x 35                                 | 30-35 x 30-35 | 35-41x 23-36                          |
| <b>Section thickness (mm)</b>            | 4-8                 | 4-8               | 4-5                                  | 2.2-2.5                                 | 2-2.2         | 4-8                                   |

- a- Imaging performed on clinical 1.5 Tesla (Symphony, Aera, Avanto or Espree, Siemens Healthcare) or 3 Tesla (Skyra, Vida, Prisma Fit or Biograph mMR Siemens Healthcare) systems.
- b- VIBE (Siemens Healthcare).
- c- Diffusion-weighted imaging was performed with two b values (0, 50 and 800 mm<sup>2</sup>/sec) automatically derived from the ADC map.
- d- IP=in-phase, OP=opposed phase.

**Supplementary Table 3. Clear Cell Renal Cell Carcinoma Likelihood Score ‘Tip Sheet’.**

| MAJOR CRITERIA                                            | EVALUATION<br><br>(ALL MASSES)                                                                                                                                                                                           | DATA ENTRY                                                                                      |
|-----------------------------------------------------------|--------------------------------------------------------------------------------------------------------------------------------------------------------------------------------------------------------------------------|-------------------------------------------------------------------------------------------------|
| T2W Signal Intensity (SI)<br><br>relative to renal cortex | -Evaluate only the SOLID (enhancing) components<br><br>(determined on the delayed phase)<br><br>-Assign the T2W SI based on the PREDOMINANT pattern<br><br>(not the brightest area)                                      | ___ HYPERINTENSE<br><br>___ ISOINTENSE<br><br>___ HYPOINTENSE                                   |
| CORTICOMEDULLARY (CM)<br><br>PHASE ENHANCEMENT            | QUANTITATIVE: ROI MEASUREMENT<br><br>-Place ROI (~100 mm <sup>2</sup> ) in MOST enhancing area<br><br>-Place ROI (~100 mm <sup>2</sup> ) in adjacent renal cortex<br><br>-Calculate the ratio: Tumor SI/Cortex SI * 100% | SI Ratio = _____ %<br><br>___ INTENSE (>75%)<br><br>___ MODERATE (40-75%)<br><br>___ LOW (<40%) |
| MICROSCOPIC FAT                                           | UNEQUIVOCAL drop of signal intensity comparing OP to IP<br><br>images<br><br>Subjective, quantitative for equivocal presence of<br><br>microscopic fat:<br><br>(SI.tumor.IP - SI.tumor.OP) > (SD.IP + SD.OP)             | ___ MICROSCOPIC FAT<br><br>___ NO MICROSCOPIC FAT                                               |
|                                                           |                                                                                                                                                                                                                          |                                                                                                 |
| MINOR CRITERIA (ANCILLARY<br>FEATURES)                    | EVALUATION<br><br>(ONLY WHEN ALGORITHM INDICATES)                                                                                                                                                                        | DATA ENTRY                                                                                      |
| SEGMENTAL ENHANCEMENT                                     | 'FLIP FLOP' enhancement – one portion of the tumor                                                                                                                                                                       |                                                                                                 |

|                                              |                                                                                                                                                                                          |                                                                                                                     |
|----------------------------------------------|------------------------------------------------------------------------------------------------------------------------------------------------------------------------------------------|---------------------------------------------------------------------------------------------------------------------|
| INVERSION                                    | 'washes out' and another 'washes in' comparing the CM and delayed phase.<br><br>-Not necessarily on the same section.                                                                    | ____ SEI PRESENT<br><br>____ SEI ABSENT                                                                             |
| RESTRICTED DIFFUSION                         | -Evaluate the solid (enhancing component)<br><br>-Evaluate the PREDOMINANT pattern relative to renal cortex<br><br>-Restricted diffusion=High signal on high b DWI and low signal on ADC | ____ RESTRICTED DIFFUSION<br><br>____ NO RESTRICTED DIFFUSION                                                       |
| Arterial to Delayed Enhancement Ratio (ADER) | ADER = $\frac{SI.tumor.CM - SI.tumor.PRE}{SI.tumor.NG - SI.tumor.PRE}$<br><br>SUBJECTIVE = Does the tumor washout on the NG Phase compared to the CM phase                               | ADER = _____<br><br>____ $\geq 1.5$<br><br>____ $< 1.5$<br><br>____ TUMOR WASHES OUT<br>____ TUMOR DOES NOT WASHOUT |

**Supplementary Table 4. Individual radiologist diagnostic performance (sensitivity, specificity, positive predictive and negative predictive values) and overall results<sup>1</sup> for the diagnosis of clear cell RCC using a multiparametric MRI clear cell likelihood score of 4 (likely) or 5 (very likely) as a positive test result.**

|                      | <b>Sensitivity<br/>(95% CI)</b> | <b>Specificity<br/>(95% CI)</b> | <b>Positive<br/>Predictive Value<br/>(95% CI)</b> | <b>Negative<br/>Predictive Value<br/>(95% CI)</b> | <b>Overall Accuracy<br/>(95% CI)</b> |
|----------------------|---------------------------------|---------------------------------|---------------------------------------------------|---------------------------------------------------|--------------------------------------|
| <b>Institution 1</b> |                                 |                                 |                                                   |                                                   |                                      |
| <b>Radiologist 1</b> | 88%<br>(69%, 99%)               | 60%<br>(39%, 79%)               | 69%<br>(50%, 84%)                                 | 83%<br>(59%, 96%)                                 | 74%<br>(62%, 86%)                    |
| <b>Radiologist 2</b> | 64%<br>(43%, 82%)               | 72%<br>(51%, 88%)               | 70%<br>(47%, 87%)                                 | 67%<br>(46%, 84%)                                 | 68%<br>(55%, 81%)                    |
| <b>Institution 2</b> |                                 |                                 |                                                   |                                                   |                                      |
| <b>Radiologist 1</b> | 90%<br>(68%, 99%)               | 70%<br>(51, 85%)                | 67%<br>(46%, 84%)                                 | 91%<br>(72%, 99%)                                 | 80%<br>(69%, 91%)                    |
| <b>Radiologist 2</b> | 80%<br>(56, 94%)                | 87%<br>(69, 96%)                | 80%<br>(56%, 94%)                                 | 87%<br>(69%, 96%)                                 | 83%<br>(72%, 94%)                    |
| <b>Institution 3</b> |                                 |                                 |                                                   |                                                   |                                      |
| <b>Radiologist 1</b> | 72%<br>(51%, 89%)               | 88%<br>(69%, 98%)               | 86%<br>(64%, 94%)                                 | 76%<br>(57%, 90%)                                 | 80%<br>(69%, 91%)                    |
| <b>Radiologist 2</b> | 72%<br>(51, 88%)                | 92%<br>(74%, 99%)               | 90%<br>(68%, 99%)                                 | 76%<br>(58%, 90%)                                 | 82%<br>(72%, 93%)                    |
| <b>Institution 4</b> |                                 |                                 |                                                   |                                                   |                                      |
| <b>Radiologist 1</b> | 77%<br>(54, 92%)                | 79%<br>(59%, 92%)               | 74%<br>(52%, 90%)                                 | 82%<br>(62%, 94%)                                 | 78%<br>(66%, 90%)                    |
| <b>Radiologist 2</b> | 59%<br>(36%, 79%)               | 82%<br>(63%, 94%)               | 72%<br>(47%, 90%)                                 | 72%<br>(53%, 86%)                                 | 71%<br>(58%, 83%)                    |
| <b>Institution 5</b> |                                 |                                 |                                                   |                                                   |                                      |
| <b>Radiologist 1</b> | 74%<br>(54, 89%)                | 78%<br>(56%, 93%)               | 80%<br>(59%, 93%)                                 | 72%<br>(51%, 88%)                                 | 76%<br>(64%, 88%)                    |

|                      |                                |                                 |                                 |                                 |                                |
|----------------------|--------------------------------|---------------------------------|---------------------------------|---------------------------------|--------------------------------|
| <b>Radiologist 2</b> | 74%<br>(54%, 89%)              | 74%<br>(52, 90%)                | 77%<br>(56%, 91%)               | 71%<br>(49%, 87%)               | 74%<br>(62%, 86%)              |
| <b>Overall</b>       | <b>75%</b><br><b>(68%-81%)</b> | <b>78%</b><br><b>(72%, 84%)</b> | <b>76%</b><br><b>(69%, 81%)</b> | <b>77%</b><br><b>(72%, 82%)</b> | <b>77%</b><br><b>(66%-88%)</b> |

1-Overall results are derived from a random-effects logistic regression model.

**Supplementary Table 5. Individual radiologists' negative predictive value and pooled results<sup>1</sup> for the exclusion of clear cell RCC using a multiparametric MRI clear cell likelihood score of 2 (unlikely) or 1 (very unlikely) as a negative test result.**

|                      | <b>Sensitivity<br/>(95% CI)</b> | <b>Specificity<br/>(95% CI)</b> | <b>Positive<br/>Predictive Value<br/>(95% CI)</b> | <b>Negative<br/>Predictive Value<br/>(95% CI)</b> | <b>Overall Accuracy<br/>(95% CI)</b> |
|----------------------|---------------------------------|---------------------------------|---------------------------------------------------|---------------------------------------------------|--------------------------------------|
| <b>Institution 1</b> |                                 |                                 |                                                   |                                                   |                                      |
| <b>Radiologist 1</b> | 100%<br>(54%, 100%)             | 62%<br>(54%, 71%)               | 57%<br>(41%, 72%)                                 | 100%<br>(54.1%, 100%)                             | 62%<br>(54%, 71%)                    |
| <b>Radiologist 2</b> | 100%                            | 70%                             | 63%                                               | 100%                                              | 70%                                  |

|                      |                   |                   |                   |                   |                   |
|----------------------|-------------------|-------------------|-------------------|-------------------|-------------------|
|                      | (70%, 100%)       | (60%, 80%)        | (46%, 77%)        | (69.2%, 100%)     | (60%, 80%)        |
| <b>Institution 2</b> |                   |                   |                   |                   |                   |
| <b>Radiologist 1</b> | 100%              | 40%               | 53%               | 100%              | 70%               |
|                      | (83%, 100%)       | (23%, 59%)        | (36%, 69%)        | (73.5%, 100%)     | (61%, 79%)        |
| <b>Radiologist 2</b> | 95%               | 43%               | 53%               | 93%               | 69%               |
|                      | (75%, 100%)       | (26%, 63%)        | (36%, 70%)        | (66%, 99%)        | (59%, 79%)        |
| <b>Institution 3</b> |                   |                   |                   |                   |                   |
| <b>Radiologist 1</b> | 96%               | 48%               | 65%               | 92%               | 72%               |
|                      | (80%, 100%)       | (28%, 69%)        | (48%, 90%)        | (64%, 99%)        | (61%, 83%)        |
| <b>Radiologist 2</b> | 88%               | 48%               | 63%               | 80%               | 68%               |
|                      | (69%, 98%)        | (28%, 69%)        | (45%, 79%)        | (52%, 96%)        | (56%, 80%)        |
| <b>Institution 4</b> |                   |                   |                   |                   |                   |
| <b>Radiologist 1</b> | 91%               | 61%               | 65%               | 90%               | 76%               |
|                      | (71%, 99%)        | (41%, 79%)        | (45%, 81%)        | (67%, 99%)        | (65%, 87%)        |
| <b>Radiologist 2</b> | 82%               | 39%               | 51%               | 73%               | 61%               |
|                      | (60%, 95%)        | (22%, 59%)        | (34%, 69%)        | (45%, 92%)        | (48%, 73%)        |
| <b>Institution 5</b> |                   |                   |                   |                   |                   |
| <b>Radiologist 1</b> | 93%               | 30%               | 61%               | 78%               | 62%               |
|                      | (76%, 99%)        | (13%, 53%)        | (45%, 76%)        | (40%, 97%)        | (51%, 72%)        |
| <b>Radiologist 2</b> | 96%               | 26%               | 86%               | 86%               | 61%               |
|                      | (81%, 100%)       | (10%, 48%)        | (42%, 100%)       | (42%, 100%)       | (51%, 71%)        |
| <b>Overall</b>       | <b>94%</b>        | <b>40%</b>        | <b>59%</b>        | <b>88%</b>        | <b>66%</b>        |
|                      | <b>(91%, 97%)</b> | <b>(35%, 46%)</b> | <b>(54%, 64%)</b> | <b>(81%, 93%)</b> | <b>(57%, 77%)</b> |

1-Pooled results were derived from a random-effects logistic regression model.
